# Supplementary material for: Mitochondrial Peptide Humanin Facilitates Chemoresistance in Glioblastoma Cells
Source: MDPI journal article supplement (doi:10.3390/cancers15164061), 2023-08-11

## SUPPLEMENTARY FIGURE

### Supplementary Figure S1: HN mRNA expression in human GBM cells treated with chemotherapy

Human GBM cells (U251) were incubated with or without cisplatin (5  $\mu$ M) for 48 h. HN mRNA expression levels were quantified using qPCR. The gel shows bands corresponding to specific HN amplification in response to chemotherapy.

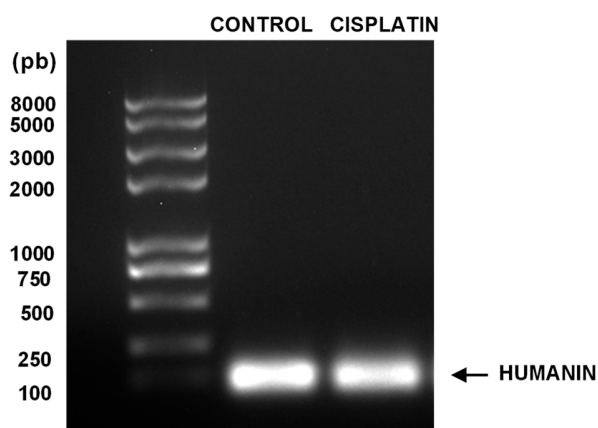

### Supplementary Figure S2. Zimography of active MMPs in HNGF6A-treated GBM cellconditioned media

SDS-PAGE gelatin zymography of conditioned media from human GBM U251-MG cells incubated in the presence of HNGF6A (1.25  $\mu$ M) for 48 h (n = 3 replicates/condition). The table indicates the densitometric value of each band as assessed with the ImageJ software (Version: 1.53k). The zymographic activity was expressed as a percentage in relation to a standard internal sample that is saturated at a density of 50%. A representative gel is shown.

| SAMPLE           | %MMP-2 | %MMP-9 |
|------------------|--------|--------|
| Internal control | 100.00 | 100.00 |
| CONTROL 1        | 126.83 | 5.99   |
| CONTROL 2        | 117.90 | 6.75   |
| CONTROL 3        | 145.46 | 8.38   |
| HNGF6A 1         | 164.51 | 8.21   |
| HNGF6A 2         | 167.72 | 7.86   |
| HNGF6A 3         | 136.64 | 8.94   |

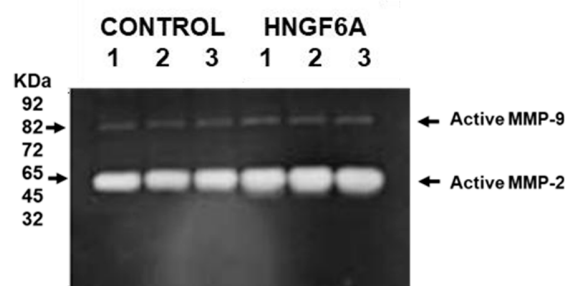

### Supplementary Figure S3: Chemotherapy up-regulates HN expression in murine GBM cells

Murine Gli26 GBM cells were incubated with 5  $\mu$ M cisplatin for 48 h. HN expression was assessed by immunofluorescence. Images show cells immunostained with HN antibody (red), and DAPI-stained nuclei (blue).

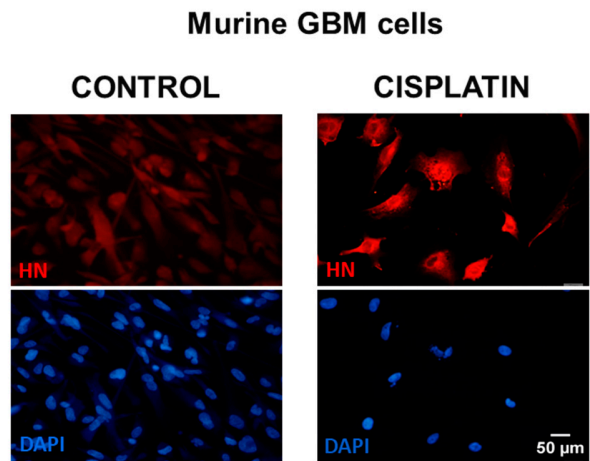

Supplement: s1 [file s1]
